# Supplementary material
Source: PubMed Central journal article supplement (PMC7881907)
Supplement: 11596_2021_2312_MOESM1_ESM.pdf [file 11596_2021_2312_MOESM1_ESM.pdf]

## **ANNEX 1 Follow-up Questionnaire**

### **A: Do you have a loss of smell or flavor? (No loss of smell/ flavor, we recorded 0 score)**

Please select the score (0–10) you consider appropriate to assess the severity, where 0 is no loss of smell/ flavor and 10 is total loss of smell/ flavor (flavor of food and drinks).

### **B: Do you have a loss of taste (acid, salty, sweet, bitter)? (No loss of taste, we recorded 0 score)**

Please select the score (0–10) you consider appropriate to assess the severity, where 0 is no loss of taste and 10 is total loss of taste. Taste is considered only for acid, bitter, salty, and sweet.

### **C: If you have had disorder of smell or taste, is the loss of smell or taste your first symptom of COVID-19?**

1: Yes, I felt a loss of smell or taste before the onset of general symptoms (fever, fatigue, myalgia, etc.).

2: No, I felt a loss of smell or taste after/simultaneously with the onset of general symptoms (fever, fatigue, difficulty in breathing, etc.).

3: I can't tell the order in which they appear.

### **D: If you have had disorders of smell or taste, please indicate how many days have you suffered from this disorder:**

1: I still have loss of smell or taste despite of being recovered from other throat/nasal or general symptoms since .....

2: I still have loss of smell and taste as well as the other throat/nasal or general symptoms since.....

3: The loss of smell or taste had lasted for — days and I have recovered.

### **E: Do you have any comorbidity (allergic rhinitis, chronic rhinosinusitis, asthma and chronic obstructive pulmonary disease) of upper respiratory tract?**

1: Yes. Which one?

2: No.

3: I don't know.

### **F: Do you have any nasal symptom (nasal obstruction, rhinorrhea, nasal itching and sneezing) of upper respiratory tract?**

What are they? Please select the score (0–10) you consider appropriate to assess the severity, where 0 is no nasal symptom and 10 is the worst imaginable complaint of nasal symptom.

### **G: If you have had nasal symptoms (nasal obstruction, rhinorrhea, nasal itching and sneezing), are they your first symptoms of COVID-19?**

1: Yes, I felt nasal symptoms before the onset of general symptoms (fever, fatigue, myalgia, etc.).

2: No, I felt nasal symptoms after/simultaneously with the onset of general symptoms (fever, fatigue, difficulty breathing, etc.).

3: I can't tell the order in which they appear.

**Table E1 Demographic and clinical characteristics of 1172 etiologically confirmed patients stratified by the presence of loss of smell and loss of taste**

| Characteristics                                  | Without loss of smell and taste | With loss of smell or taste | With loss of smell and taste | <i>P</i> value |
|--------------------------------------------------|---------------------------------|-----------------------------|------------------------------|----------------|
| Subject, <i>n</i> (%)                            | 881 (75.2)                      | 205 (17.5)                  | 86 (7.3)                     | –              |
| Gender, male, <i>n</i> (%)                       | 444 (50.4)                      | 92 (44.9)                   | 41 (47.7)                    | 0.35           |
| Age, years, median (IQR)                         | 62 (48, 69)                     | 59 (46, 67)*                | 57.5 (42.75, 66)*            | 0.03           |
| Severe cases, <i>n</i> (%)                       | 146 (16.6)                      | 38 (18.5)                   | 15 (17.4)                    | 0.79           |
| Loss of smell/taste recovered, <i>n</i> (%)      | –                               | 182 (88.8)                  | 79 (91.9)                    | 0.53           |
| Loss of smell/taste duration, days, median (IQR) | –                               | 7 (5, 14.25)                | 8 (7, 13)                    | 0.39           |
| Any airway comorbidity, <i>n</i> (%)             | 147 (16.7)                      | 40 (19.5)                   | 16 (18.6)                    | 0.59           |
| AR                                               | 87 (9.9)                        | 19 (9.3)                    | 9 (10.5)                     | 0.94           |
| CRS                                              | 50 (5.7)                        | 18 (8.8)                    | 4 (4.7)                      | 0.21           |
| Asthma                                           | 22 (2.5)                        | 4 (2.0)                     | 3 (3.5)                      | 0.74           |
| COPD                                             | 7 (0.8)                         | 2 (1.0)                     | 1 (1.2)                      | 0.92           |
| Systemic signs and symptoms, <i>n</i> (%)        | –                               | –                           | –                            | –              |
| Fever                                            | 684 (77.6)                      | 168 (82.0)                  | 69 (80.2)                    | 0.37           |
| Cough                                            | 579 (65.7)                      | 129 (62.9)                  | 59 (68.6)                    | 0.51           |
| Myalgia                                          | 127 (14.4)                      | 31 (15.1)                   | 14 (16.3)                    | 0.88           |
| Fatigue                                          | 209 (23.7)                      | 52 (25.4)                   | 24 (27.9)                    | 0.64           |
| Anorexia                                         | 203 (23.0)                      | 52 (25.4)                   | 19 (22.1)                    | 0.75           |
| Confusion                                        | 5 (0.6)                         | 1 (0.5)                     | 0 (0)                        | 0.78           |
| Dizziness                                        | 39 (4.4)                        | 8 (3.9)                     | 5 (5.8)                      | 0.77           |
| Laboratory results                               | –                               | –                           | –                            | –              |
| Blood routine, subject, <i>n</i>                 | 881                             | 205                         | 86                           | –              |
| White blood cell count, ×10 <sup>9</sup> /L      | 5.5 (4.4, 6.9)                  | 5.4 (4.2, 6.9)              | 6.0 (4.6, 7.7)               | 0.08           |
| Neutrophil count, ×10 <sup>9</sup> /L            | 3.8 (2.7, 5.2)                  | 3.7 (2.6, 5.5)              | 3.9 (2.8, 5.4)               | 0.52           |
| Neutrophil percentage                            | 65.3 (56.9, 74)                 | 64.1 (57, 72.5)             | 68.5 (57.4, 74.5)            | 0.70           |
| Lymphocyte count, ×10 <sup>9</sup> /L            | 1.2 (0.9, 1.6)                  | 1.3 (0.8, 1.6)              | 1.3 (1.0, 1.6)               | 0.67           |
| Lymphocyte percentage                            | 22.9 (15.4, 31.3)               | 23.2 (17.3, 30.5)           | 21.4 (15.8, 30.3)            | 0.71           |
| Monocyte count, ×10 <sup>9</sup> /L              | 0.5 (0.4, 0.7)                  | 0.5 (0.4, 0.6)              | 0.5 (0.4, 0.7)               | 0.30           |
| Monocyte percentage                              | 8.7 (7.1, 10.5)                 | 9 (7.1, 10.6)               | 8.7 (6.7, 10.6)              | 0.82           |
| Eosinophil count, ×10 <sup>9</sup> /L            | 0.05 (0.01, 0.1)                | 0.04 (0, 0.09)              | 0.04 (0.01, 0.09)            | 0.64           |
| Eosinophil percentage                            | 0.9 (0.2, 1.8)                  | 0.7 (0, 1.7)                | 0.8 (0.3, 1.7)               | 0.62           |
| Platelet count, ×10 <sup>9</sup> /L              | 245.5 (191.3, 313.8)            | 245 (194, 308)              | 251 (189.5, 315.5)           | 0.84           |
| Hemoglobin, g                                    | 127 (116, 137)                  | 126 (115, 137)              | 128.5 (118, 138.3)           | 0.62           |
| Liver and renal function test, subject, <i>n</i> | 881                             | 205                         | 86                           | –              |
| Alanine aminotransferase, U/L                    | 24 (15, 41)                     | 21 (15, 37)                 | 27.5 (15, 43.3)              | 0.27           |
| Aspartate aminotransferase, U/L                  | 24 (18, 36)                     | 22 (18, 33)                 | 24.5 (18, 33)                | 0.46           |
| Albumin, g/L                                     | 36 (32.8, 39.6)                 | 36.2 (32.5, 40.4)           | 35.6 (32.4, 38.9)            | 0.61           |
| Globulin, g/L                                    | 32 (28.8, 35.7)                 | 32.1 (29.3, 35.3)           | 33.3 (28.7, 36.7)            | 0.31           |

(Continued to the next page)

(Continued from the last page)

| Characteristics                                    | Without loss of smell and taste | With loss of smell or taste | With loss of smell and taste | <i>P</i> value |
|----------------------------------------------------|---------------------------------|-----------------------------|------------------------------|----------------|
| Alkaline phosphatase, U/L                          | 66 (55, 78)                     | 63 (53, 77)                 | 62 (52, 80)                  | 0.44           |
| Total bilirubin, $\mu\text{mol/L}$                 | 8.7 (6.5, 11.8)                 | 8.5 (6.5, 12.1)             | 8.4 (6.6, 11.1)              | 0.88           |
| Lactose dehydrogenase, U/L                         | 250 (200, 317.5)                | 238 (195, 305)              | 257 (193, 320)               | 0.25           |
| Urea, mmol/L                                       | 4.2 (3.3, 5.4)                  | 4 (3.2, 5.1)                | 4 (3.3, 5.4)                 | 0.17           |
| Creatinine, $\mu\text{mol/L}$                      | 68 (57, 82)                     | 64 (56, 78)                 | 67.5 (54, 81)                | 0.19           |
| Urine acid, $\mu\text{mol/L}$                      | 255 (195, 315)                  | 248.5 (194.5, 293.5)        | 251 (202.8, 311.3)           | 0.84           |
| Glomerular filtration, mL/min/1.73 m <sup>2</sup>  | 93.6 (81.9, 103.5)              | 95.1 (85.2, 106.9)          | 95.6 (84.3, 109.9)           | 0.08           |
| Electrolytes, subject, <i>n</i>                    | 881                             | 205                         | 86                           | –              |
| K <sup>+</sup> , mmol/L                            | 4.16 (3.82, 4.47)               | 4.17 (3.82, 4.49)           | 4.08 (3.81, 4.41)            | 0.52           |
| Na <sup>+</sup> , mmol/L                           | 139.7 (137.4, 141.5)            | 139.8 (137.9, 142)          | 139.7 (137.6, 141.5)         | 0.24           |
| Cl <sup>-</sup> , mmol/L                           | 101.3 (98.8, 103.3)             | 101.3 (99.1, 103.5)         | 101.5 (99.0, 103.6)          | 0.88           |
| Ca <sup>2+</sup> , mmol/L                          | 2.16 (2.09, 2.23)               | 2.16 (2.07, 2.25)           | 2.16 (2.08, 2.25)            | 0.87           |
| Cardiac troponin I, pg/mL                          | 3.3 (1.9, 7.4)                  | 3.1 (1.9, 6.6)              | 2.6 (1.9, 7)                 | 0.50           |
| ESR, mm/h                                          | 30 (14, 55.5)                   | 35 (19, 62)                 | 27 (12, 60)                  | 0.27           |
| CRP, mg/L                                          | 5.6 (1.4, 27.7)                 | 5.3 (1.2, 26.8)             | 6.4 (2, 39.5)                | 0.32           |
| Inflammatory mediators, subject, <i>n</i>          | 730                             | 178                         | 75                           | –              |
| Ferritin, $\mu\text{g/L}$                          | 525.9 (314.2, 879.6)            | 515.9 (289.2, 764.1)        | 594.1 (252.2, 1035.4)        | 0.38           |
| Interleukin-10, pg/mL                              | 5 (5, 5)                        | 5 (5, 5)                    | 5 (5, 5)                     | 0.50           |
| Interleukin-1 $\beta$ , pg/mL                      | 5 (5, 5)                        | 5 (5, 5)                    | 5 (5, 5)                     | 0.71           |
| Interleukin-2 receptor, U/mL                       | 502.5 (336, 779.8)              | 493 (317, 705)              | 523 (357.5, 708)             | 0.35           |
| Interleukin-6, pg/mL                               | 4.6 (2.0, 16.6)                 | 4.4 (1.9, 13.1)             | 3.9 (1.6, 12.1)              | 0.74           |
| Interleukin-8, pg/mL                               | 9.2 (5.4, 17.3)                 | 9.4 (5.4, 17.2)             | 9.1 (5, 15.7)                | 0.71           |
| Tumor necrosis factor, pg/mL                       | 8.1 (6.3, 10.4)                 | 8.1 (6.3, 10.2)             | 7.2 (5.7, 9.4)               | 0.11           |
| Procalcitonin, ng/mL                               | 0.05 (0.03, 0.07)               | 0.05 (0.03, 0.07)           | 0.05 (0.02, 0.09)            | 0.58           |
| Immunoglobulins and complements, subject, <i>n</i> | 268                             | 71                          | 27                           | –              |
| IgA, g/L                                           | 2.12 (1.62, 2.8)                | 2.15 (1.81, 2.45)           | 2.19 (1.47, 3.02)            | 0.91           |
| IgG, g/L                                           | 11.5 (10, 13.2)                 | 11.35 (9.95, 13.73)         | 11.85 (9.53, 13.38)          | 0.93           |
| IgM, g/L                                           | 0.95 (0.71, 1.34)               | 0.97 (0.79, 1.41)           | 0.91 (0.66, 1.23)            | 0.37           |
| C3, g/L                                            | 0.87 (0.76, 0.99)               | 0.89 (0.76, 1.01)           | 0.91 (0.76, 1.05)            | 0.64           |
| C4, g/L                                            | 0.23 (0.17, 0.29)               | 0.21 (0.17, 0.27)           | 0.24 (0.20, 0.29)            | 0.46           |

IQR, interquartile range; AR, allergic rhinitis; CRS, chronic rhinosinusitis; COPD, chronic obstructive pulmonary disease; ERS, erythrocyte sedimentation rate; CRP, C-reactive protein; Ig, immunoglobulin; C, complement. Data are presented as medians and interquartile ranges (IQR) for continuous variables and number with percentage for categorical variables. *P* values were calculated from Kruskal-Wallis,  $\chi^2$  test or Fisher's exact test. \**P*<0.05 vs. mild

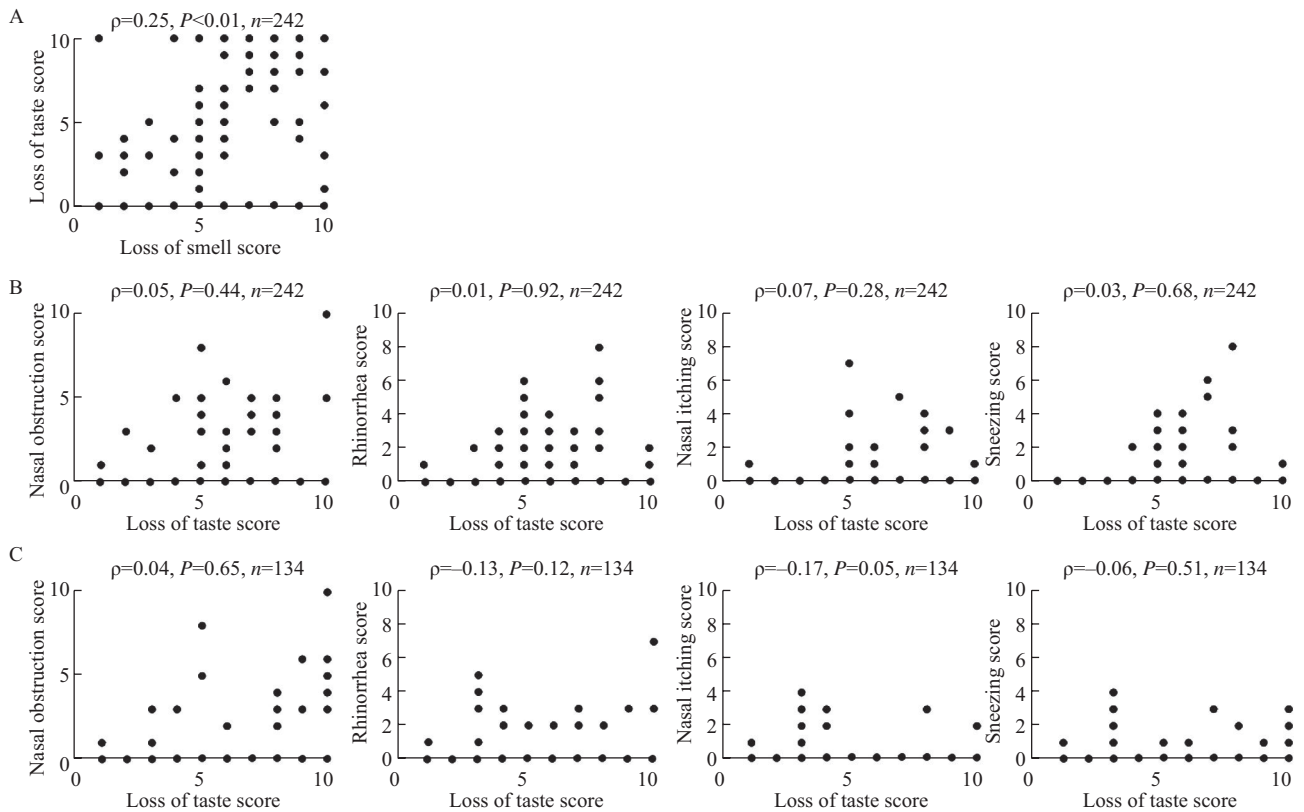

**Fig. E1** Correlations between different upper airway tract symptom severity

A: Self-reported loss of taste scores correlate with loss of smell scores in patients reporting taste disorder. B: the correlations between self-reported loss of taste scores and scores of other self-reported nasal symptoms in patients reporting taste disorder. C: the correlations between self-reported loss of smell scores and scores of other self-reported nasal symptoms in patients reporting smell disorder. Severity of self-reported nasal symptoms was scored by patients on a numerical rating scale of 0–10, with 0 being “no complaint whatsoever” and 10 being “the worst imaginable complaint”.
